# Supplementary material
Source: MDPI journal article supplement (https://www.mdpi.com/2311-7524/7/5/105)
Supplement: s1 [file s1]

**Table S1.** The best results of in vitro experiments with *Ricinus communis* L.

| Genotype                                                          | Type of explant                                                        | Combination of PGR             | Results                       |                                  |                    | Reference                     |
|-------------------------------------------------------------------|------------------------------------------------------------------------|--------------------------------|-------------------------------|----------------------------------|--------------------|-------------------------------|
|                                                                   |                                                                        |                                | Frequency of callus induction | Frequency of shoot organogenesis | Shoots per explant |                               |
| cv. "Shabje"                                                      | hypocotyls                                                             | 2.0 mg/L 6-BAP + 0.5 mg/L NAA  | 100%                          |                                  |                    | Rahman and Bari, 2014 [43]    |
| Genotype from Botanic Garden, Rajshahi University                 | cotyledons and axillary meristem regions with hypocotyls (3–5 cm long) | 3.0 mg/L 6-BAP                 |                               | 85%                              | 12.56              | Alam et al., 2010 [45]        |
| "VERC-02"                                                         | epicotyl sections                                                      | 1.0 mg/L TDZ + 0.5 mg/L Zeatin |                               | 75,56%                           | 4,3                | Gil-Correal et al., 2019 [48] |
| Genotype from Biotech and Nuclear Agricultural Research Institute | Shoot tips                                                             | 0.5 mg/L 2iP                   |                               | 90%                              |                    | Danso et al., 2011 [46]       |
| Genotype from Inner Mongolia University of the Nationalities      | hypocotyls                                                             | 0.3 mg/L TDZ                   |                               | 86,7%                            | 31,11              | Zhang et al., 2016 [47]       |
| cv "48-1"                                                         | Shoot tips                                                             | 2.0 mg/L 6-BAP                 |                               |                                  | 46,7               | Sujatha and Reddy, 1998 [44]  |
