# Supplementary material
Source: MDPI journal article supplement (https://www.mdpi.com/2311-7524/7/5/105)
Supplement: s1 [file s1 › Table S2.pdf]

**Table S2.** Days of the regeneration start in different explants of Zanzibar Green, and Impala Bronzovaya castor bean varieties, depending on the variant of the cultural environment.

| Cultural medium | Day of the regeneration start |                     |                    |                   |                     |                    |
|-----------------|-------------------------------|---------------------|--------------------|-------------------|---------------------|--------------------|
|                 | Zanzibar Green                |                     |                    | Impala Bronzovaya |                     |                    |
|                 | Hypocotyl                     | Cotyledonous leaves | Cotyledon petioles | Hypocotyl         | Cotyledonous leaves | Cotyledon petioles |
| MS 1            | -                             | -                   | -                  | -                 | -                   | -                  |
| MS 2            | -                             | -                   | 21 <sup>th</sup>   | -                 | -                   | 18 <sup>th</sup>   |
| MS 3            | -                             | -                   | -                  | -                 | -                   | -                  |
| MS 4            | -                             | -                   | -                  | -                 | -                   | -                  |
| MS 5            | 17 <sup>th</sup>              | -                   | 12 <sup>th</sup>   | 19 <sup>th</sup>  | -                   | 11 <sup>th</sup>   |
| MS 6            | 18 <sup>th</sup>              | -                   | 11 <sup>th</sup>   | 18 <sup>th</sup>  | -                   | 14 <sup>th</sup>   |
| MS 7            | -                             | -                   | 13 <sup>th</sup>   | -                 | -                   | 11 <sup>th</sup>   |
| MS 8            | -                             | -                   | -                  | -                 | -                   | 13 <sup>th</sup>   |
